# Supplementary material
Source: publisher site journal article supplement (http://www.kjim.org/upload/media/kjim-2020-380-suppl1.pdf)
Supplement: Supplementary file 1 [file kjim-2020-380-suppl1.pdf]

**Supplementary Table 1. Definition of covariates**

| Diagnosis                | ICD-10 codes                                                                  | Claim codes                                                                  |
|--------------------------|-------------------------------------------------------------------------------|------------------------------------------------------------------------------|
| Hypertension             | I10-I11                                                                       | Prescription of antihypertensive drugs $\geq 1$                              |
| Heart failure            | I11.0, I13.0, I13.2, I50.0, I50.1, I50.9                                      | Admission or outpatient department $\geq 1$                                  |
| Diabetes                 | E10-E14                                                                       | Prescription of anti-diabetic drugs $\geq 1$                                 |
| Dyslipidemia             | E78                                                                           | Prescription of lipid-lowering drugs $\geq 1$                                |
| MI and stroke            | I21-I24 for MI, I60-I69 for stroke                                            | Admission or outpatient department $\geq 1$                                  |
| Liver disease            | K70, K72-K76, K71.3-K71.7                                                     | Admission or outpatient department $\geq 1$                                  |
| Cancer                   | C00-C97                                                                       | Admission or outpatient department $\geq 1$                                  |
| COPD                     | J41-J44                                                                       | Admission or outpatient department $\geq 1$                                  |
| Asthma                   | J45-J46                                                                       | Admission or outpatient department $\geq 1$                                  |
| ESRD with dialysis       | N18-N19, Z49, Z99.2                                                           | O701-O702 for hemodialysis $\geq 1$ or O707 for peritoneal dialysis $\geq 1$ |
| Immunocompromised status | M05-M09, M30-M36 for autoimmune disease, B20-B24, F24, O987, Z21 for HIV/AIDS | Admission or outpatient department $\geq 1$                                  |

ICD-10, 10th revision of the International Statistical Classification of Diseases; MI, myocardial infarction; COPD, chronic obstructive pulmonary disease; ESRD, end-stage renal disease.
